# Supplementary material for: Sweeping-micelle to solvent stacking for the on-line preconcentration and determination of organic acids in Angelica sinensis by capillary electrophoresis
Source: Royal Society of Chemistry journal article supplement (doi:10.1039/c7ra11553a), 2018-01-01
Supplement: c7ra11553a1.pdf [file c7ra11553a1.pdf]

## **Electronic Supplementary Information**

### **Sweeping-micelle to solvent stacking for on-line preconcentration and determination of organic acids in *Angelica sinensis* by capillary electrophoresis**

Xiumin Yang, Lin Hao, Shuaihua Zhang, Chun Wang, Zhi Wang\*

Department of Chemistry, College of Science, Agricultural University of Hebei,  
Baoding 071001, China.

## Supplement of Figure

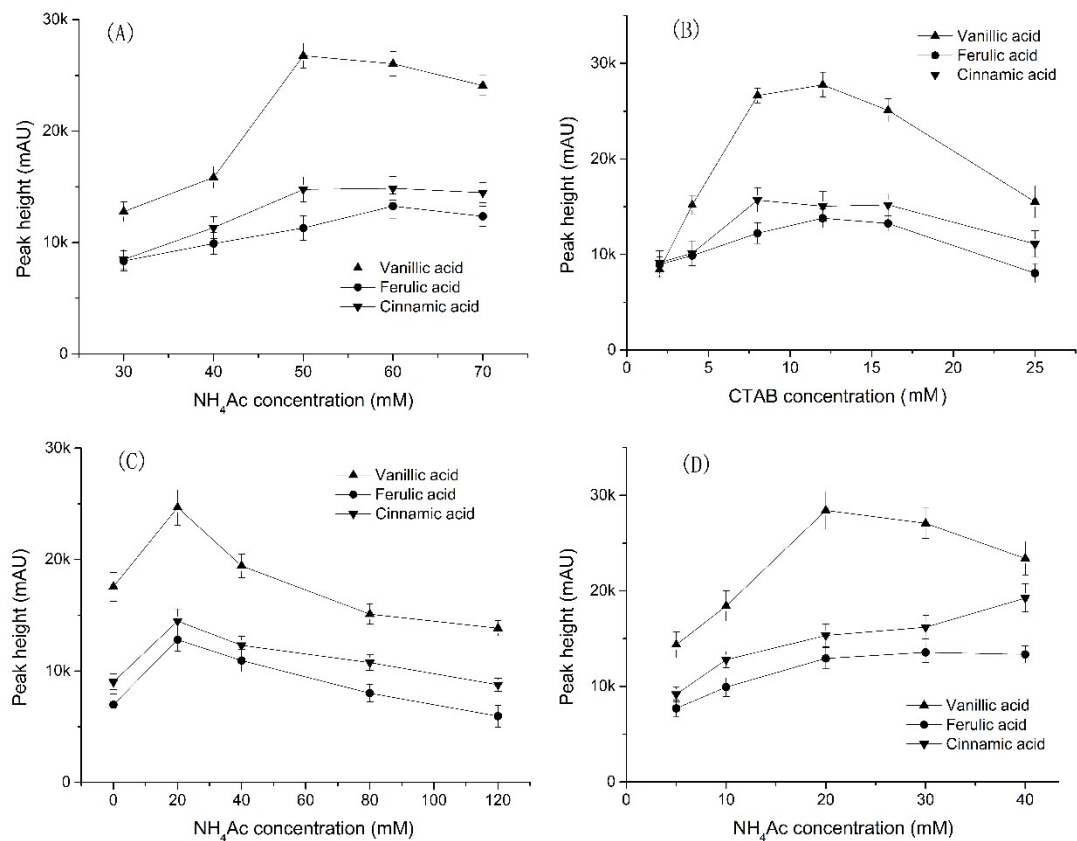

**Fig. S1.** Effect of  $\text{NH}_4\text{Ac}$  concentration in BGS(A); effect of CTAB (B) and  $\text{NH}_4\text{Ac}$  (C) concentration in micellar solution; effect of  $\text{NH}_4\text{Ac}$  concentration in sample matrix.  $5 \mu\text{g mL}^{-1}$  each of organic acid. Other conditions are the optimum conditions.

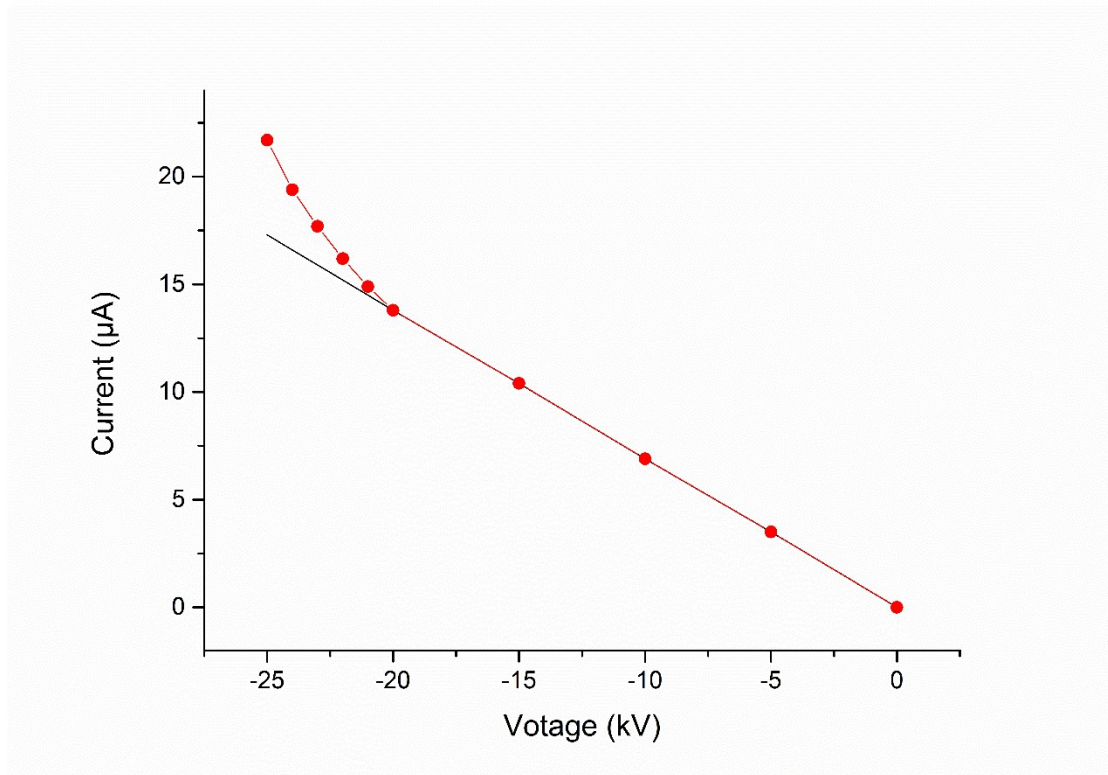

**Fig. S2.** The relationship between the applied voltage and the produced current for the BGS

## Supplement of Tables

**Table S1 Effect of pH value of BGS**

|               | pH   | Theoretical plate number (USP) | Resolution (USP) |
|---------------|------|--------------------------------|------------------|
| Vanillic acid | 12.0 | 45655                          |                  |
|               | 12.5 | 45760                          |                  |
| Ferulic acid  | 12.0 | 35947                          | 3.2              |
|               | 12.5 | 35888                          | 2.0              |
| IS            | 12.0 | 33823                          | 2.0              |
|               | 12.5 | 23853                          | 1.7              |
| Cinnamic acid | 12.0 | 41502                          | 5.3              |
|               | 12.5 | 35357                          | 3.5              |

**Table S 2 Effect of injection time of micellar solution at 0.5 psi**

| Compound      | Injection time (s) | Theoretical plate number (USP) | Resolution (USP) |
|---------------|--------------------|--------------------------------|------------------|
| Vanillic acid | 30                 | 73374                          |                  |
|               | 40                 | 44383                          |                  |
| Ferulic acid  | 30                 | 53215                          | 2.8              |
|               | 40                 | 34388                          | 2.0              |
| IS            | 30                 | 29107                          | 2.0              |
|               | 40                 | 23521                          | 1.5              |
| Cinnamic acid | 30                 | 53401                          | 4.8              |
|               | 40                 | 39808                          | 3.6              |

**Table S3 Effect of injection of sample solution at 0.5 psi**

| Compound      | Injection time (s) | Theoretical plate number (USP) | Resolution (USP) |
|---------------|--------------------|--------------------------------|------------------|
| Vanillic acid | 15                 | 47701                          |                  |
|               | 30                 | 54882                          |                  |
|               | 45                 | 73374                          |                  |
|               | 60                 | 67474                          |                  |
|               | 75                 | 52473                          |                  |
| Ferulic acid  | 15                 | 36766                          | 2.6              |
|               | 30                 | 55876                          | 2.4              |
|               | 45                 | 63215                          | 2.8              |
|               | 60                 | 47864                          | 2.6              |
|               | 75                 | 42891                          | 2.8              |
| IS            | 15                 | 27684                          | 2.4              |
|               | 30                 | 29107                          | 2.4              |
|               | 45                 | 61134                          | 2.0              |
|               | 60                 | 26701                          | 1.7              |
|               | 75                 | 22324                          | 1.0              |
| Cinnamic acid | 15                 | 36766                          | 5.9              |
|               | 30                 | 53401                          | 5.4              |
|               | 45                 | 67386                          | 4.8              |
|               | 60                 | 41116                          | 4.3              |
|               | 75                 | 39592                          | 3.0              |

**Table S4 Effect of injection time of micellar solution and sample solution (ratio at 2/3)**

| Compound      | MS : S  | Theoretical plate number (USP) | Resolution (USP) |
|---------------|---------|--------------------------------|------------------|
| Vanillic acid | 30:45   | 73374                          |                  |
|               | 36:54   | 46583                          |                  |
|               | 45:67.5 | 26434                          |                  |
| Ferulic acid  | 30:45   | 53215                          | 2.8              |
|               | 36:54   | 45788                          | 2.4              |
|               | 45:67.5 | 28491                          | 2.1              |
| IS            | 30:45   | 29107                          | 2.0              |
|               | 36:54   | 17997                          | 1.3              |
|               | 45:67.5 | 12926                          | 0.8              |
| Cinnamic acid | 30:45   | 53401                          | 4.8              |
|               | 36:54   | 33353                          | 3.5              |
|               | 45:67.5 | 16483                          | 2.8              |
